# Supplementary material for: Incidence and outcome of COVID-19 following vaccine and hybrid immunity in patients on immunosuppressive therapy: identification of protective post-immunisation anti-RBD antibody levels in a prospective cohort study
Source: PubMed Central journal article supplement — RMD Open. 2024 Apr 9;10(2):e003545. doi: 10.1136/rmdopen-2023-003545 (PMC11015197; doi:10.1136/rmdopen-2023-003545), 2024-04-09

## Supplemental material

Supplement to HS Ørbo, KH Bjørlykke, J Sexton et al. **Incidence and outcome of COVID-19 following vaccine and hybrid immunity in patients on immunosuppressive therapy: identification of protective post-immunisation anti-RBD antibody levels in a prospective cohort study**

**Supplemental table 1.** Inclusion and exclusion criteria

|                            |                                                                                                                                                                                                                                                                                                                                                                                                                                                                                                                                      |
|----------------------------|--------------------------------------------------------------------------------------------------------------------------------------------------------------------------------------------------------------------------------------------------------------------------------------------------------------------------------------------------------------------------------------------------------------------------------------------------------------------------------------------------------------------------------------|
| <b>Inclusion criteria</b>  | <ul style="list-style-type: none"> <li>• An established clinical diagnosis of one of the following immune-mediated diseases: rheumatoid arthritis (RA), spondyloarthritis (SpA), psoriatic arthritis (PsA), Crohn's disease (CD), and ulcerative colitis (UC)</li> <li>• On treatment with relevant immunosuppressive and/or immunomodulating medication (see below)</li> <li>• Adult patients (<math>\geq 18</math> years)</li> <li>• Patient intended to obtain vaccination against COVID-19 during the next six months</li> </ul> |
| <b>Exclusion criterion</b> | <ul style="list-style-type: none"> <li>• Allergy or intolerance to elements of the COVID-19 vaccines</li> </ul>                                                                                                                                                                                                                                                                                                                                                                                                                      |

**Supplemental table 2.** Relevant immunosuppressive medication

| <b>Medication group</b>                        | <b>Included medication</b>                                               |
|------------------------------------------------|--------------------------------------------------------------------------|
| Tumor necrosis factor inhibitor                | Infliximab, etanercept, golimumab, adalimumab, certolizumab pegol        |
| Janus kinase inhibitor                         | Tofacitinib, baricitinib, upadacitinib, filgotinib                       |
| Tumor necrosis factor inhibitor in combination | + methotrexate, azathioprine, sulfasalazine, leflunomide or prednisolone |
| Methotrexate                                   |                                                                          |
| Azathioprine                                   |                                                                          |
| Tocilizumab                                    |                                                                          |
| Abatacept                                      |                                                                          |
| Sulfasalazine                                  |                                                                          |
| Vedolizumab                                    |                                                                          |
| Ustekinumab                                    |                                                                          |
| Secukinumab                                    |                                                                          |
| Leflunomide                                    |                                                                          |
| Prednisolone                                   |                                                                          |
| 6-mercaptopurine                               |                                                                          |
| Rituximab                                      |                                                                          |

**Supplemental table 3.** Comorbidities registered according to Charlson Comorbidity Index

| Comorbidities                                                                                                             |
|---------------------------------------------------------------------------------------------------------------------------|
| Myocardial infarction                                                                                                     |
| Heart failure                                                                                                             |
| Periferal vascular disease                                                                                                |
| Aortic aneurysm                                                                                                           |
| Cerebral infarction or TIA                                                                                                |
| Dementia                                                                                                                  |
| COPD                                                                                                                      |
| Connective tissue disease                                                                                                 |
| Gastric ulcer                                                                                                             |
| Liver disease                                                                                                             |
| Diabetes                                                                                                                  |
| Paralysis                                                                                                                 |
| Moderate to severe chronic kidney disease                                                                                 |
| Malignancies                                                                                                              |
| AIDS                                                                                                                      |
| TIA: Transient ischemic attack<br>COPD: Chronic obstructive pulmonary disease<br>AIDS: Acquired immunodeficiency syndrome |

**Supplemental table 4.** Description of patients with severe COVID-19

| Sex, Age    | Disease | Comorbidities | Medication                        | Vaccine doses received prior to hospital admission | Anti-RBD antibody levels prior to admission | Time of hospital admission | Clinical features on admission   | Treatment                                | Follow-up             |
|-------------|---------|---------------|-----------------------------------|----------------------------------------------------|---------------------------------------------|----------------------------|----------------------------------|------------------------------------------|-----------------------|
| Female, 70s | RA      | Yes           | Rituximab                         | 3                                                  | 1 BAU/ml                                    | Dec. -21                   | Viral pneumonia                  | Mononuclear antibody infusion            | Outward clinic        |
| Female, 50s | RA      | Yes           | Methotrexate                      | 0                                                  | -                                           | Jan. -21                   | Viral pneumonia                  | Supplementary oxygen<br>Antibiotics i.v. | Rehabilitation centre |
| Female, 70s | PsA     | Yes           | TNF inhibitor combination therapy | 3                                                  | 2876 BAU/ml                                 | Jun. -22                   | Dizziness                        | Observation only                         | None                  |
| Male, 40s   | SpA     | Yes           | TNF inhibitor monotherapy         | 2                                                  | 132 BAU/ml                                  | Nov. -21                   | Pulmonary embolism               | Anticoagulants                           | None                  |
| Female, 70s | RA      | Yes           | TNF inhibitor monotherapy         | 2                                                  | 444 BAU/ml                                  | Sept. -21                  | Viral pneumonia<br>Renal failure | Supplementary oxygen<br>Anticoagulants   | Rehabilitation centre |
| Male, 50s   | RA      | Yes           | Rituximab                         | 0                                                  | -                                           | Mar. -21                   | Viral pneumonia                  | Antibiotics i.v.<br>Corticosteroids      | Rehabilitation centre |
| Female, 60s | RA      | Yes           | Other                             | 0                                                  | -                                           | Nov. -20                   | Viral pneumonia<br>ARDS          | ICU<br>Anticoagulants<br>Corticosteroids | Rehabilitation centre |

|                |     |     |                                         |   |            |          |                                        |                                                                              |                       |
|----------------|-----|-----|-----------------------------------------|---|------------|----------|----------------------------------------|------------------------------------------------------------------------------|-----------------------|
|                |     |     |                                         |   |            |          |                                        |                                                                              |                       |
| Male,<br>40s   | PsA | Yes | TNF inhibitor<br>monotherapy            | 0 | -          | Mar. -21 | Viral pneumonia                        | Supplementary oxygen<br>Anticoagulants<br>Corticosteroids                    | None                  |
| Female,<br>50s | RA  | Yes | JAK-inhibitor                           | 4 | -          | Mar. -22 | Viral pneumonia                        | Supplementary oxygen                                                         | None                  |
| Male,<br>30s   | SpA | Yes | TNF inhibitor<br>monotherapy            | 3 | -          | Feb. -22 | Gastroenteritis                        | Rehydration                                                                  | None                  |
| Female,<br>70s | RA  | Yes | Other                                   | 2 | 31 BAU/ml  | Nov. -21 | ARDS<br>Lung embolism<br>Enterocolitis | ICU<br>IL-inhibitor<br>Corticosteroids<br>Antibiotics i.v.<br>Anticoagulants | Rehabilitation centre |
| Male,<br>70s   | RA  | Yes | Methotrexate                            | 4 | 358 BAU/ml | Jun. -22 | Afasia, partial paralysis              | Thrombolysis                                                                 | Outward clinic        |
| Female,<br>60s | RA  | Yes | Methotrexate                            | 0 | -          | Mar. -20 | Viral pneumonia<br>ARDS                | ICU<br>Antibiotics i.v.<br>Anticoagulants                                    | Rehabilitation centre |
| Female,<br>50s | RA  | Yes | TNF inhibitor<br>combination<br>therapy | 3 | 809 BAU/ml | Jul. -22 | Syncope                                | Observation<br>only                                                          | Outward clinic        |

|                |     |      |                                         |   |             |          |                                  |                                                                            |                                         |
|----------------|-----|------|-----------------------------------------|---|-------------|----------|----------------------------------|----------------------------------------------------------------------------|-----------------------------------------|
| Male,<br>70s   | RA  | Yes  | Other                                   | 3 | 24 BAU/ml   | Jun. -22 | Viral pneumonia<br>Fall tendency | Corticosteroids                                                            | None                                    |
| Male,<br>70s   | PsA | Yes  | TNF inhibitor<br>combination<br>therapy | 4 | 713 BAU/ml  | Aug. -22 | ARDS<br>Pulmonary embolism       | ICU<br>Antivirals<br>Corticosteroids<br>Anticoagulants<br>Antibiotics i.v. | Rehabilitation centre<br>Outward clinic |
| Female,<br>30s | UC  | Yes  | JAK-inhibitor                           | 0 | -           | Mar. -20 | Viral pneumonia                  | Supplementary oxygen<br>Corticosteroids                                    | Outward clinic                          |
| Male,<br>30s   | CD  | Yes  | TNF inhibitor<br>monotherapy            | 0 | -           | Apr. -21 | Viral pneumonia                  | Anticoagulants                                                             | None                                    |
| Male,<br>30s   | UC  | None | TNF inhibitor<br>combination<br>therapy | 0 | -           | Mar. -20 | UC-flare                         | Corticosteroids<br>Anticoagulants<br>Antivirals<br>Antibiotics i.v.        | None                                    |
| Male,<br>60s   | CD  | Yes  | TNF inhibitor<br>monotherapy            | 0 | -           | Mar. -21 | Viral pneumonia<br>Renal failure | Supplementary oxygen<br>Corticosteroids<br>Rehydration                     | None                                    |
| Male,<br>60s   | UC  | Yes  | IL-inhibitor                            | 3 | 6705 BAU/ml | May -22  | Dyspnea                          | Observation only                                                           | None                                    |

|                                                                                                      |    |      |                              |   |             |          |         |                  |      |
|------------------------------------------------------------------------------------------------------|----|------|------------------------------|---|-------------|----------|---------|------------------|------|
| Male,<br>40s                                                                                         | UC | None | TNF inhibitor<br>monotherapy | 3 | 1634 BAU/ml | Jul. -22 | Dyspnea | Observation only | None |
| BAU/ml: Binding antibody units. ARDS: Acute respiratory distress syndrome. ICU: Intensive care unit. |    |      |                              |   |             |          |         |                  |      |

**Supplemental table 5.** Risk of COVID-19 after a second, third and fourth SARS-CoV-2 vaccine dose and hybrid immunity, and protective antibody levels, sensitivity analyses with additional adjustments

|                                                            | Following second dose             |                | Following third dose              |                | Following fourth dose             |                | Following hybrid immunity         |                |
|------------------------------------------------------------|-----------------------------------|----------------|-----------------------------------|----------------|-----------------------------------|----------------|-----------------------------------|----------------|
|                                                            | Patients included, n = 1392       |                | Patients included, n = 1092       |                | Patients included, n = 639        |                | Patients included, n = 212        |                |
|                                                            | Events of COVID-19, n = 61        |                | Events of COVID-19, n = 277       |                | Events of COVID-19, n = 297       |                | Events of COVID-19, n = 29        |                |
|                                                            | Time at risk (days): 205322       |                | Time at risk (days): 166120       |                | Time at risk (days): 139884       |                | Time at risk (days): 59998        |                |
|                                                            | Mean observation time (days): 147 |                | Mean observation time (days): 152 |                | Mean observation time (days): 218 |                | Mean observation time (days): 283 |                |
| <b>Anti-RBD antibody levels (BAU/ml) post-immunisation</b> | <b>HR (95% CI)</b>                | <b>p-value</b> |
| <b>&lt;50 BAU/ml</b>                                       |                                   |                |                                   |                |                                   |                |                                   |                |
| <50 *                                                      | N/A                               | ..             | 0.96 (0.42–2.24)                  | 0.93           | 0.85 (0.46–1.56)                  | 0.60           | N/A                               | ..             |
| <50 †                                                      | N/A                               | ..             | 1.08 (0.46–2.54)                  | 0.86           | 0.86 (0.47–1.58)                  | 0.63           | N/A                               | ..             |
| <50 ‡                                                      | N/A                               | ..             | 1.08 (0.46–2.53)                  | 0.86           | 0.85 (0.46–1.58)                  | 0.61           | N/A                               | ..             |
| <50 §                                                      | N/A                               | ..             | 1.19 (0.50–2.81)                  | 0.69           | 0.84 (0.45–1.54)                  | 0.56           | N/A                               | ..             |
| <b>&lt;100 BAU/ml</b>                                      |                                   |                |                                   |                |                                   |                |                                   |                |
| <100 *                                                     | 0.41 (0.06–2.96)                  | 0.37           | 1.02 (0.46–2.23)                  | 0.97           | 0.98 (0.57–1.68)                  | 0.93           | N/A                               | ..             |
| <100 †                                                     | 0.41 (0.06–3.01)                  | 0.38           | 1.15 (0.52–2.55)                  | 0.73           | 0.99 (0.57–1.71)                  | 0.98           | N/A                               | ..             |
| <100 ‡                                                     | 0.38 (0.05–2.79)                  | 0.34           | 1.15 (0.52–2.55)                  | 0.73           | 0.98 (0.57–1.70)                  | 0.96           | N/A                               | ..             |
| <100 §                                                     | 0.41 (0.06–3.03)                  | 0.38           | 1.27 (0.57–2.83)                  | 0.56           | 0.96 (0.56–1.66)                  | 0.89           | N/A                               | --             |
| <b>&lt;200 BAU/ml</b>                                      |                                   |                |                                   |                |                                   |                |                                   |                |
| <200 *                                                     | 0.34 (0.05–2.48)                  | 0.29           | 0.99 (0.52–1.91)                  | 0.98           | 1.05 (0.63–1.76)                  | 0.84           | N/A                               | ..             |
| <200 †                                                     | 0.34 (0.05–2.50)                  | 0.29           | 1.19 (0.61–2.32)                  | 0.60           | 1.09 (0.65–1.82)                  | 0.75           | N/A                               | ..             |
| <200 ‡                                                     | 0.32 (0.04–2.35)                  | 0.26           | 1.19 (0.61–2.32)                  | 0.60           | 1.08 (0.65–1.81)                  | 0.77           | N/A                               | ..             |
| <200 §                                                     | 0.34 (0.05–2.52)                  | 0.29           | 1.28 (0.66–2.49)                  | 0.47           | 1.06 (0.63–1.77)                  | 0.84           | N/A                               | ..             |



| <b>&lt;1000 BAU/ml</b> |                  |      |                  |       |                  |       |     |    |
|------------------------|------------------|------|------------------|-------|------------------|-------|-----|----|
| <1000 *                | 0.99 (0.50–1.97) | 0.97 | 0.73 (0.47–1.14) | 0.17  | 0.98 (0.66–1.46) | 0.94  | N/A | .. |
| <1000 †                | 1.01 (0.50–2.03) | 0.98 | 0.87 (0.56–1.37) | 0.55  | 1.04 (0.70–1.55) | 0.85  | N/A | .. |
| <1000 ‡                | 0.97 (0.48–1.93) | 0.92 | 0.88 (0.56–1.37) | 0.57  | 1.03 (0.69–1.53) | 0.90  | N/A | .. |
| <1000 §                | 0.99 (0.49–1.99) | 0.98 | 0.89 (0.57–1.40) | 0.62  | 1.00 (0.67–1.49) | 0.99  | N/A | .. |
| <b>&lt;2000 BAU/ml</b> |                  |      |                  |       |                  |       |     |    |
| <2000 *                | 1.28 (0.76–2.15) | 0.36 | 1.06 (0.77–1.44) | 0.74  | 1.00 (0.73–1.36) | 1.00  | N/A | .. |
| <2000 †                | 1.30 (0.77–2.19) | 0.33 | 1.20 (0.87–1.65) | 0.26  | 1.05 (0.77–1.44) | 0.74  | N/A | .. |
| <2000 ‡                | 1.34 (0.79–2.27) | 0.27 | 1.19 (0.87–1.64) | 0.27  | 1.05 (0.77–1.44) | 0.74  | N/A | .. |
| <2000 §                | 1.38 (0.82–2.34) | 0.23 | 1.21 (0.88–1.66) | 0.25  | 1.02 (0.75–1.40) | 0.89  | N/A | .. |
| <b>&lt;3000 BAU/ml</b> |                  |      |                  |       |                  |       |     |    |
| <3000 *                | 1.05 (0.63–1.75) | 0.86 | 1.00 (0.76–1.33) | 0.99  | 1.19 (0.91–1.56) | 0.21  | N/A | .. |
| <3000 †                | 1.04 (0.62–1.74) | 0.88 | 1.08 (0.81–1.43) | 0.60  | 1.27 (0.96–1.67) | 0.09  | N/A | .. |
| <3000 ‡                | 1.05 (0.63–1.76) | 0.85 | 1.09 (0.82–1.45) | 0.55  | 1.26 (0.96–1.66) | 0.10  | N/A | .. |
| <3000 §                | 1.08 (0.64–1.81) | 0.77 | 1.10 (0.83–1.46) | 0.51  | 1.27 (0.97–1.67) | 0.097 | N/A | .. |
| <b>&lt;4000 BAU/ml</b> |                  |      |                  |       |                  |       |     |    |
| <4000 *                | 0.85 (0.51–1.43) | 0.54 | 1.15 (0.88–1.49) | 0.30  | 1.11 (0.86–1.43) | 0.41  | N/A | .. |
| <4000 †                | 0.85 (0.51–1.43) | 0.55 | 1.21 (0.93–1.57) | 0.16  | 1.17 (0.90–1.51) | 0.24  | N/A | .. |
| <4000 ‡                | 0.84 (0.50–1.42) | 0.53 | 1.21 (0.93–1.58) | 0.15  | 1.17 (0.91–1.51) | 0.22  | N/A | .. |
| <4000 §                | 0.84 (0.50–1.42) | 0.53 | 1.23 (0.94–1.60) | 0.13  | 1.17 (0.91–1.51) | 0.23  | N/A | .. |
| <b>&lt;5000 BAU/ml</b> |                  |      |                  |       |                  |       |     |    |
| <5000                  | 0.74 (0.44–1.24) | 0.25 | 1.26 (0.98–1.61) | 0.069 | 1.14 (0.90–1.45) | 0.29  | N/A | .. |
| <5000 †                | 0.75 (0.44–1.28) | 0.29 | 1.36 (1.06–1.75) | 0.014 | 1.20 (0.94–1.52) | 0.15  | N/A | .. |
| <5000 ‡                | 0.75 (0.44–1.27) | 0.28 | 1.36 (1.06–1.74) | 0.015 | 1.19 (0.94–1.52) | 0.15  | N/A | .. |

|                         |                  |       |                  |         |                  |         |                   |        |
|-------------------------|------------------|-------|------------------|---------|------------------|---------|-------------------|--------|
| <5000 <sup>§</sup>      | 0.75 (0.44–1.27) | 0.28  | 1.35 (1.06–1.74) | 0.017   | 1.18 (0.93–1.50) | 0.18    | N/A               | ..     |
| <b>&lt;6000 BAU/ml</b>  |                  |       |                  |         |                  |         |                   |        |
| <6000 <sup>*</sup>      | 0.69 (0.40–1.20) | 0.19  | 1.27 (1.00–1.62) | 0.049   | 1.24 (0.98–1.56) | 0.074   | 4.41 (1.87–10.44) | 0.0010 |
| <6000 <sup>†</sup>      | 0.70 (0.40–1.22) | 0.20  | 1.37 (1.08–1.74) | 0.011   | 1.28 (1.02–1.62) | 0.036   | 4.47 (1.87–10.67) | 0.0010 |
| <6000 <sup>‡</sup>      | 0.67 (0.38–1.17) | 0.16  | 1.36 (1.07–1.73) | 0.013   | 1.27 (1.00–1.60) | 0.049   | 4.47 (1.87–10.67) | 0.0010 |
| <6000 <sup>§</sup>      | 0.65 (0.37–1.13) | 0.13  | 1.32 (1.04–1.69) | 0.023   | 1.26 (0.99–1.59) | 0.056   | ..                | ..     |
| <b>&lt;7000 BAU/ml</b>  |                  |       |                  |         |                  |         |                   |        |
| <7000 <sup>*</sup>      | 0.59 (0.33–1.08) | 0.086 | 1.27 (1.00–1.62) | 0.053   | 1.27 (1.00–1.60) | 0.047   | 4.20 (1.83–9.65)  | 0.0010 |
| <7000 <sup>†</sup>      | 0.61 (0.34–1.11) | 0.10  | 1.34 (1.05–1.71) | 0.020   | 1.33 (1.05–1.68) | 0.019   | 4.14 (1.79–9.57)  | 0.0010 |
| <7000 <sup>‡</sup>      | 0.57 (0.31–1.04) | 0.07  | 1.32 (1.03–1.68) | 0.028   | 1.30 (1.03–1.65) | 0.030   | 4.17 (1.79–9.70)  | 0.0010 |
| <7000 <sup>§</sup>      | 0.53 (0.29–0.97) | 0.039 | 1.30 (1.02–1.65) | 0.036   | 1.29 (1.01–1.63) | 0.039   | ..                | ..     |
| <b>&lt;8000 BAU/ml</b>  |                  |       |                  |         |                  |         |                   |        |
| <8000 <sup>*</sup>      | 0.61 (0.30–1.24) | 0.17  | 1.40 (1.08–1.80) | 0.010   | 1.39 (1.09–1.77) | 0.0078  | 3.85 (1.67–8.85)  | 0.0020 |
| <8000 <sup>†</sup>      | 0.62 (0.30–1.27) | 0.19  | 1.47 (1.14–1.90) | 0.0033  | 1.44 (1.13–1.83) | 0.0033  | 3.84 (1.67–9.87)  | 0.0020 |
| <8000 <sup>‡</sup>      | 0.58 (0.28–1.20) | 0.14  | 1.44 (1.11–1.85) | 0.0057  | 1.40 (1.10–1.79) | 0.0065  | 3.89 (1.67–9.04)  | 0.0020 |
| <8000 <sup>§</sup>      | 0.51 (0.25–1.07) | 0.076 | 1.40 (1.09–1.81) | 0.0093  | 1.38 (1.08–1.75) | 0.010   | ..                | ..     |
| <b>&lt;9000 BAU/ml</b>  |                  |       |                  |         |                  |         |                   |        |
| <9000 <sup>*</sup>      | 0.83 (0.34–2.02) | 0.69  | 1.36 (1.04–1.79) | 0.026   | 1.52 (1.18–1.96) | 0.001   | 3.01 (1.32–6.87)  | 0.0090 |
| <9000 <sup>†</sup>      | 0.82 (0.34–1.99) | 0.66  | 1.42 (1.08–1.87) | 0.012   | 1.59 (1.23–2.06) | 0.00039 | 3.07 (1.34–7.05)  | 0.0080 |
| <9000 <sup>‡</sup>      | 0.74 (0.30–1.80) | 0.50  | 1.45 (1.10–1.91) | 0.0080  | 1.54 (1.19–1.99) | 0.00098 | 3.13 (1.35–7.26)  | 0.0080 |
| <9000 <sup>§</sup>      | 0.60 (0.24–1.51) | 0.28  | 1.41 (1.07–1.86) | 0.013   | 1.52 (1.18–1.97) | 0.0013  | ..                | ..     |
| <b>&lt;10000 BAU/ml</b> |                  |       |                  |         |                  |         |                   |        |
| <10000 <sup>*</sup>     | 1.26 (0.38–4.22) | 0.71  | 1.62 (1.19–2.19) | 0.0019  | 1.53 (1.17–1.99) | 0.0017  | 2.93 (1.30–6.56)  | 0.0090 |
| <10000 <sup>†</sup>     | 1.24 (0.37–4.15) | 0.73  | 1.68 (1.24–2.28) | 0.00087 | 1.59 (1.22–2.07) | 0.00061 | 2.99 (1.33–6.73)  | 0.0080 |

|                         |                   |      |                  |         |                  |         |                  |        |
|-------------------------|-------------------|------|------------------|---------|------------------|---------|------------------|--------|
| <10000 ‡                | 1.33 (0.39–4.50)  | 0.65 | 1.70 (1.25–2.31) | 0.00064 | 1.53 (1.17–2.00) | 0.0017  | 3.04 (1.34–6.89) | 0.0080 |
| <10000 §                | 1.10 (0.31–3.82)  | 0.89 | 1.66 (1.22–2.25) | 0.0011  | 1.50 (1.15–1.96) | 0.0026  | ..               | ..     |
| <b>&lt;11000 BAU/ml</b> |                   |      |                  |         |                  |         |                  |        |
| <11000 *                | 1.25 (0.28–5.64)  | 0.77 | 1.71 (1.23–2.40) | 0.0017  | 1.55 (1.17–2.05) | 0.0020  | 2.52 (1.13–5.61) | 0.024  |
| <11000 †                | 1.27 (0.28–5.73)  | 0.75 | 1.79 (1.27–2.50) | 0.00075 | 1.64 (1.24–2.17) | 0.00055 | 2.62 (1.17–5.85) | 0.019  |
| <11000 ‡                | 1.44 (0.32–6.52)  | 0.64 | 1.84 (1.31–2.58) | 0.00041 | 1.57 (1.19–2.08) | 0.0017  | 2.67 (1.18–6.06) | 0.019  |
| <11000 §                | 1.05 (0.21–5.20)  | 0.95 | 1.80 (1.29–2.53) | 0.00062 | 1.53 (1.16–2.03) | 0.0029  | ..               | ..     |
| <b>&lt;12000 BAU/ml</b> |                   |      |                  |         |                  |         |                  |        |
| <12000 *                | 1.14 (0.25–5.18)  | 0.86 | 1.90 (1.32–2.75) | 0.00060 | 1.46 (1.09–1.95) | 0.012   | 2.34 (1.07–5.15) | 0.034  |
| <12000 †                | 1.18 (0.26–5.36)  | 0.83 | 1.97 (1.36–2.86) | 0.00031 | 1.50 (1.12–2.02) | 0.0066  | 2.40 (1.09–5.28) | 0.030  |
| <12000 ‡                | 1.33 (0.29–6.11)  | 0.71 | 2.03 (1.40–2.94) | 0.00017 | 1.47 (1.09–1.97) | 0.010   | 2.42 (1.09–5.37) | 0.029  |
| <12000 §                | 0.92 (0.18–4.66)  | 0.92 | 1.98 (1.36–2.86) | 0.00031 | 1.44 (1.07–1.93) | 0.015   | ..               | ..     |
| <b>&lt;13000 BAU/ml</b> |                   |      |                  |         |                  |         |                  |        |
| <13000 *                | 0.96 (0.21–4.35)  | 0.96 | 1.83 (1.23–2.73) | 0.0031  | 1.35 (0.99–1.85) | 0.061   | 1.99 (0.91–4.38) | 0.086  |
| <13000 †                | 0.99 (0.22–4.49)  | 0.99 | 1.90 (1.27–2.85) | 0.0017  | 1.38 (1.01–1.90) | 0.042   | 2.04 (0.93–4.51) | 0.077  |
| <13000 ‡                | 1.12 (0.25–5.12)  | 0.88 | 1.96 (1.31–2.93) | 0.0011  | 1.34 (0.98–1.83) | 0.07    | 2.06 (0.93–4.59) | 0.076  |
| <13000 §                | 0.64 (0.13–3.17)  | 0.58 | 1.93 (1.29–2.89) | 0.0014  | 1.30 (0.95–1.77) | 0.11    | ..               | ..     |
| <b>&lt;14000 BAU/ml</b> |                   |      |                  |         |                  |         |                  |        |
| <14000 *                | 1.34 (0.17–10.46) | 0.78 | 1.47 (0.95–2.28) | 0.086   | 1.40 (1.00–1.95) | 0.049   | 1.52 (0.68–3.40) | 0.31   |
| <14000 †                | 1.40 (0.18–10.79) | 0.75 | 1.55 (1.00–2.41) | 0.052   | 1.45 (1.04–2.03) | 0.028   | 1.51 (0.67–3.40) | 0.32   |
| <14000 ‡                | 1.60 (0.21–12.33) | 0.65 | 1.60 (1.03–2.49) | 0.038   | 1.40 (1.00–1.95) | 0.051   | 1.52 (0.67–3.44) | 0.32   |
| <14000 §                | 0.68 (0.08–5.92)  | 0.72 | 1.66 (1.06–2.58) | 0.026   | 1.34 (0.96–1.88) | 0.082   | ..               | ..     |
| <b>&lt;15000 BAU/ml</b> |                   |      |                  |         |                  |         |                  |        |
| <15000 *                | N/A               | ..   | 1.30 (0.75–2.23) | 0.35    | 1.28 (0.91–1.81) | 0.15    | 2.02 (0.88–4.63) | 0.10   |

|                         |     |    |                  |      |                  |       |                  |      |
|-------------------------|-----|----|------------------|------|------------------|-------|------------------|------|
| <15000 †                | N/A | .. | 1.34 (0.78–2.31) | 0.29 | 1.33 (0.95–1.88) | 0.10  | 2.03 (0.88–4.68) | 0.10 |
| <15000 ‡                | N/A | .. | 1.38 (0.80–2.38) | 0.24 | 1.35 (0.96–1.90) | 0.087 | 2.06 (0.89–4.78) | 0.10 |
| <15000 §                | N/A | .. | 1.39 (0.81–2.39) | 0.23 | 1.31 (0.93–1.85) | 0.12  |                  |      |
| <b>&lt;16000 BAU/ml</b> |     |    |                  |      |                  |       |                  |      |
| <16000 *                | N/A | .. | 1.40 (0.72–2.74) | 0.32 | 1.29 (0.91–1.84) | 0.16  | 1.77 (0.77–4.06) | 0.18 |
| <16000 †                | N/A | .. | 1.38 (0.70–2.69) | 0.35 | 1.34 (0.94–1.91) | 0.11  | 1.78 (0.77–4.09) | 0.18 |
| <16000 **               | N/A | .. | 1.41 (0.72–2.76) | 0.31 | 1.35 (0.95–1.93) | 0.10  | 1.79 (0.77–4.15) | 0.17 |
| <16000 §                | N/A | .. | 1.37 (0.70–2.67) | 0.36 | 1.31 (0.92–1.87) | 0.14  | ..               | ..   |
| <b>&lt;17000 BAU/ml</b> |     |    |                  |      |                  |       |                  |      |
| <17000 *                | N/A | .. | 1.56 (0.69–3.55) | 0.29 | 1.33 (0.92–1.91) | 0.13  | 1.62 (0.71–3.73) | 0.25 |
| <17000 †                | N/A | .. | 1.52 (0.67–3.46) | 0.32 | 1.36 (0.95–1.96) | 0.096 | 1.65 (0.71–3.80) | 0.24 |
| <17000 ‡                | N/A | .. | 1.57 (0.69–3.57) | 0.29 | 1.38 (0.96–1.99) | 0.082 | 1.66 (0.71–3.86) | 0.24 |
| <17000 §                | N/A | .. | 1.52 (0.67–3.46) | 0.32 | 1.33 (0.93–1.92) | 0.12  | ..               | ..   |
| <b>&lt;18000 BAU/ml</b> |     |    |                  |      |                  |       |                  |      |
| <18000 *                | N/A | .. | 1.47 (0.65–3.34) | 0.36 | 1.29 (0.90–1.86) | 0.16  | 1.94 (0.84–4.50) | 0.12 |
| <18000 †                | N/A | .. | 1.41 (0.62–3.22) | 0.41 | 1.34 (0.93–1.92) | 0.12  | 1.97 (0.85–4.58) | 0.11 |
| <18000 ‡                | N/A | .. | 1.45 (0.63–3.31) | 0.38 | 1.35 (0.94–1.94) | 0.10  | 2.00 (0.85–4.67) | 0.11 |
| <18000 §                | N/A | .. | 1.41 (0.62–3.20) | 0.42 | 1.33 (0.92–1.91) | 0.13  | ..               | ..   |
| <b>&lt;19000 BAU/ml</b> |     |    |                  |      |                  |       |                  |      |
| <19000 *                | N/A | .. | 1.37 (0.60–3.12) | 0.45 | 1.41 (0.96–2.07) | 0.079 | 1.94 (0.84–4.49) | 0.12 |
| <19000 †                | N/A | .. | 1.31 (0.57–2.99) | 0.53 | 1.48 (1.00–2.17) | 0.048 | 1.97 (0.85–4.58) | 0.11 |
| <19000 ‡                | N/A | .. | 1.35 (0.59–3.08) | 0.48 | 1.49 (1.01–2.19) | 0.042 | 2.00 (0.85–4.67) | 0.11 |
| <19000 §                | N/A | .. | 1.30 (0.57–2.98) | 0.53 | 1.46 (0.99–2.14) | 0.055 | ..               | ..   |
| <b>&lt;20000 BAU/ml</b> |     |    |                  |      |                  |       |                  |      |

|                                                                                |     |    |                  |      |                  |      |                  |      |
|--------------------------------------------------------------------------------|-----|----|------------------|------|------------------|------|------------------|------|
| <20000 *                                                                       | N/A | .. | 1.60 (0.58–4.41) | 0.36 | 1.32 (0.90–1.95) | 0.16 | 1.81 (0.79–4.16) | 0.16 |
| <20000 †                                                                       | N/A | .. | 1.62 (0.59–4.48) | 0.35 | 1.37 (0.93–2.02) | 0.11 | 1.84 (0.80–4.27) | 0.15 |
| <20000 ‡                                                                       | N/A | .. | 1.69 (0.61–4.66) | 0.31 | 1.39 (0.94–2.04) | 0.10 | 1.86 (0.80–4.33) | 0.15 |
| <20000 §                                                                       | N/A | .. | 1.61 (0.59–4.44) | 0.35 | 1.35 (0.91–1.99) | 0.13 | ..               | ..   |
| <b>&lt;25000 BAU/ml</b>                                                        |     |    |                  |      |                  |      |                  |      |
| <25000 *                                                                       | N/A | .. | N/A              | ..   | 1.28 (0.85–1.94) | 0.24 | 1.24 (0.54–2.85) | 0.60 |
| <25000 †                                                                       | N/A | .. | N/A              | ..   | 1.32 (0.87–1.99) | 0.19 | 1.26 (0.55–2.91) | 0.59 |
| <25000 ‡                                                                       | N/A | .. | N/A              | ..   | 1.33 (0.88–2.01) | 0.17 | 1.30 (0.54–2.94) | 0.59 |
| <25000 §                                                                       | N/A | .. | N/A              | ..   | 1.28 (0.85–1.94) | 0.24 | ..               | ..   |
| *Adjusted for calendar month                                                   |     |    |                  |      |                  |      |                  |      |
| †Adjusted for age, sex and calendar month                                      |     |    |                  |      |                  |      |                  |      |
| ‡Adjusted for age, sex, calendar month and comorbidities                       |     |    |                  |      |                  |      |                  |      |
| §Adjusted for age, sex, calendar month, prior Covid-19, plus any comorbidities |     |    |                  |      |                  |      |                  |      |

**Supplemental figure 1.** Patient distribution showing patients excluded and included in each Cox regression analyses based on providing post-vaccination blood samples

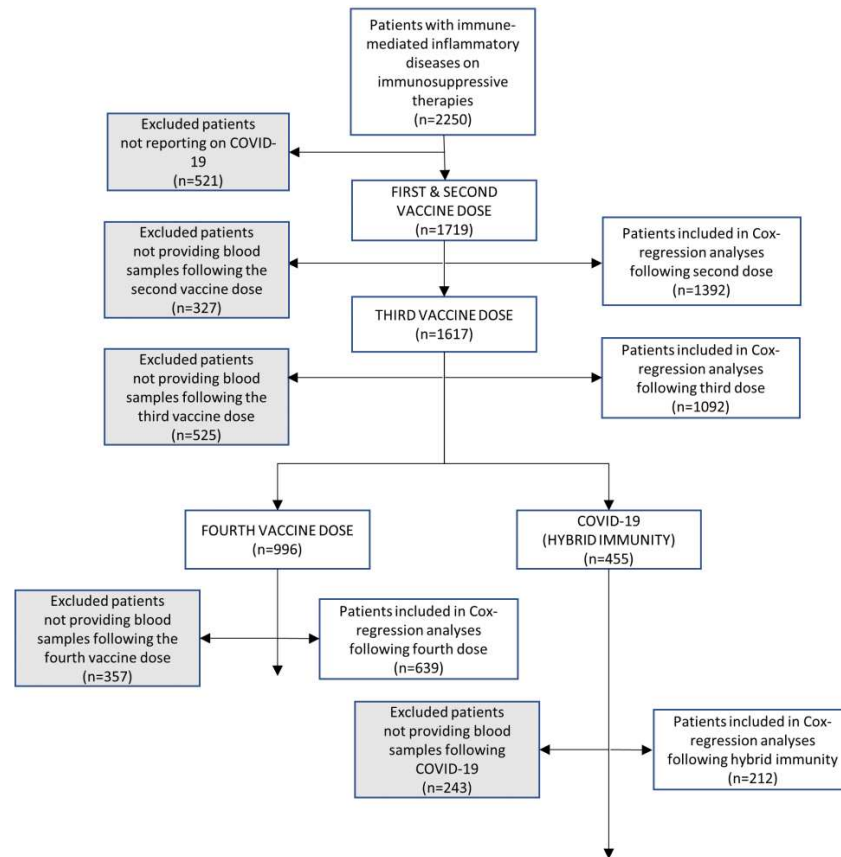

**Supplemental figure 2.** Inclusion of patients in the Cox regression analyses where stippled line indicates timing of inclusion for analyses (created with BioRender.com)

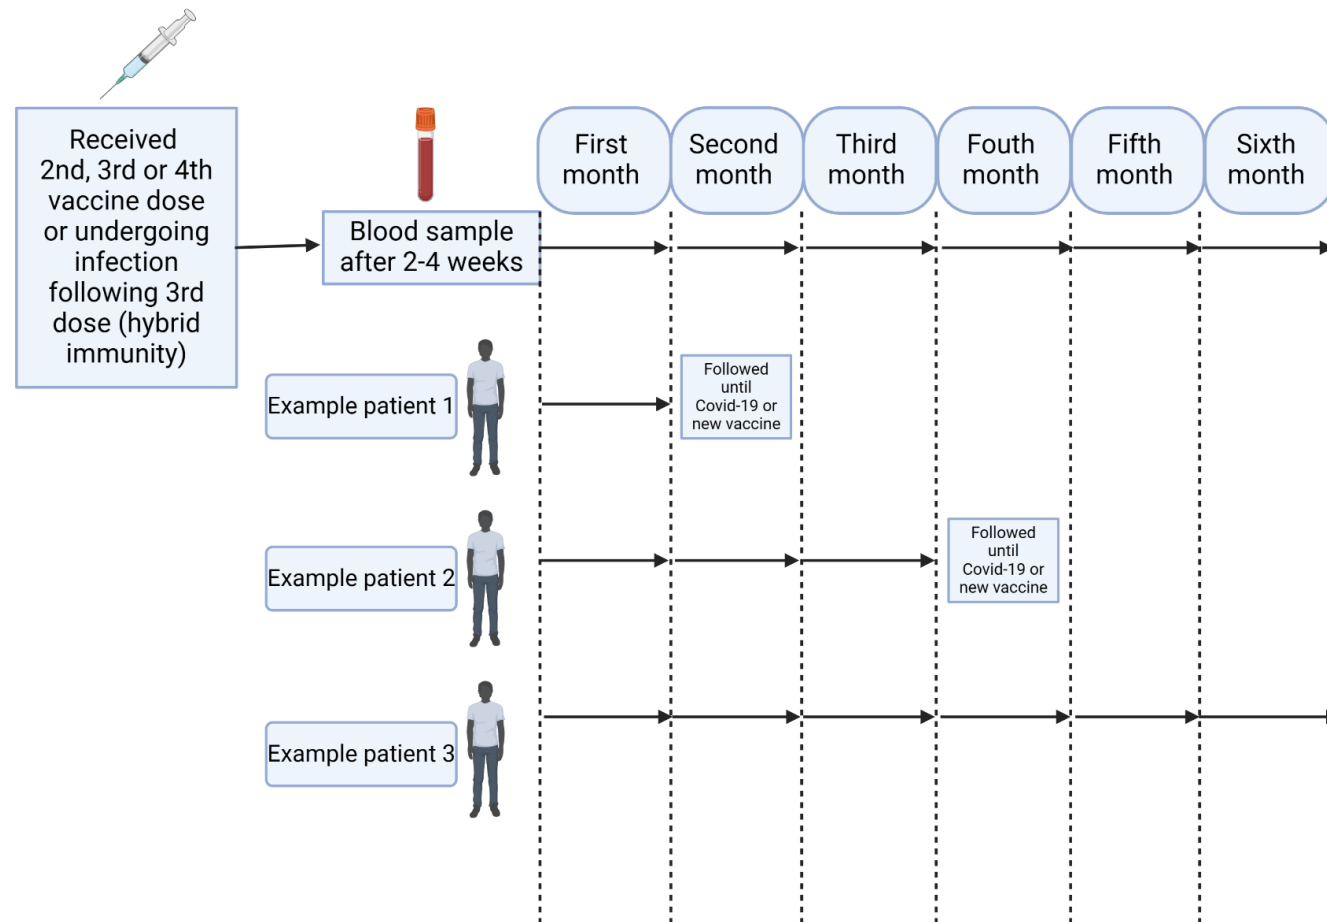

**Supplemental figure 3a.** Cumulative distribution of COVID-19 among included patients during the study period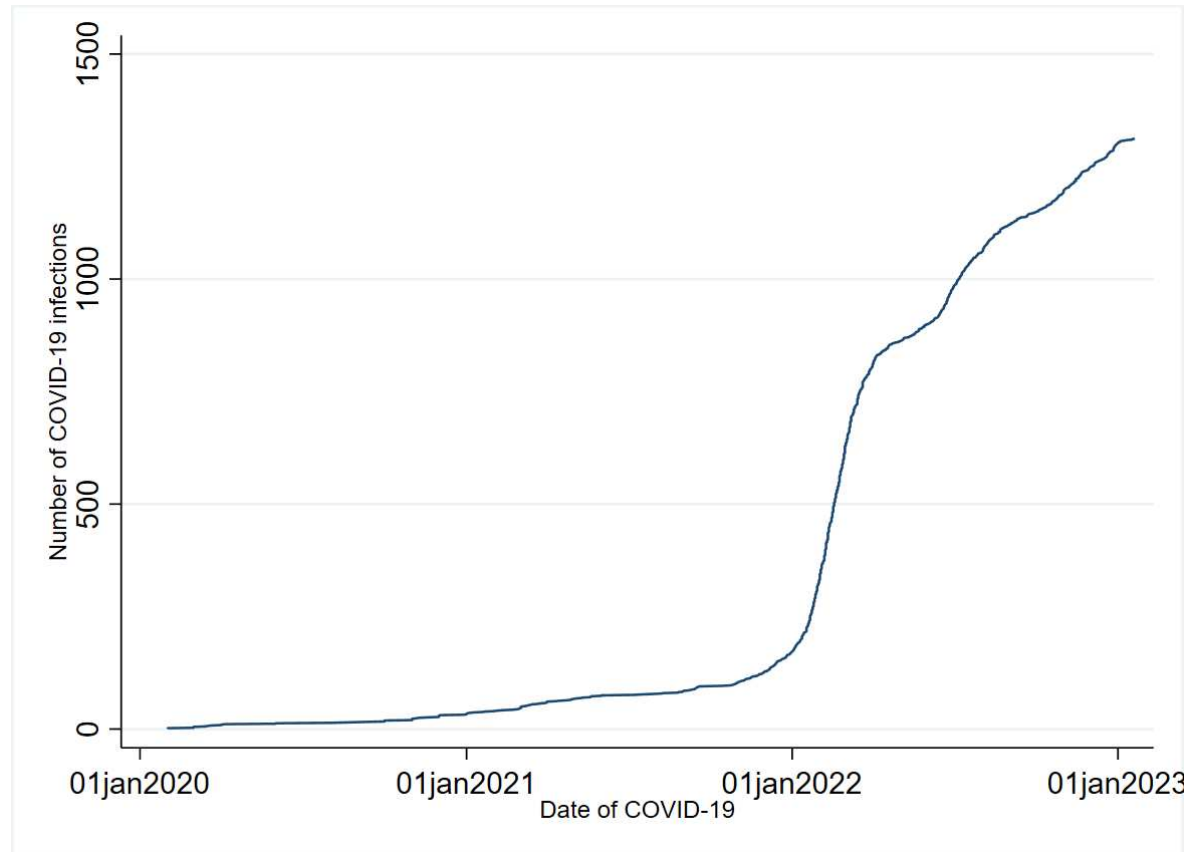



**Supplemental figure 3b.** Cumulative distribution of COVID-19 in the hybrid vs vaccine group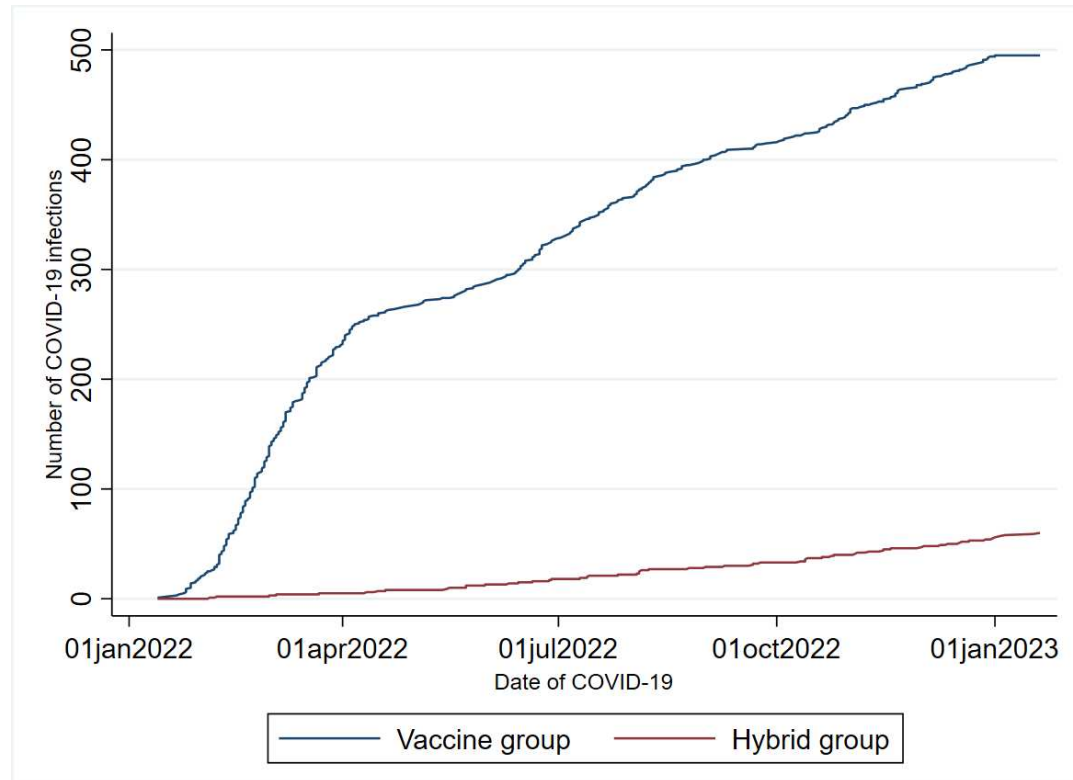

Supplement: rmdopen-2023-003545supp001.pdf [file rmdopen-2023-003545supp001.pdf]
